# Supplementary material
Source: PubMed Central journal article supplement (PMC5389363)

# Supplementary Figure 4

A

Menin/Alexa Fluor 488 protein expression (fold-change)

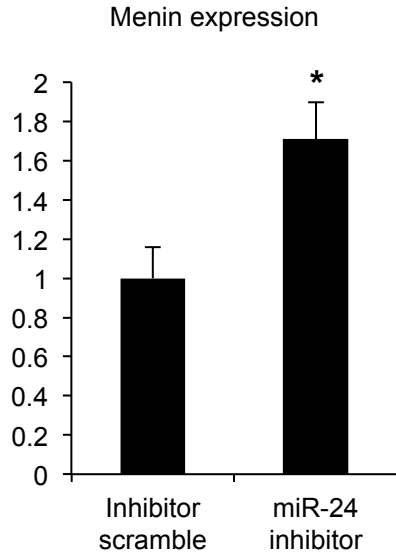

B

Ki67 expression

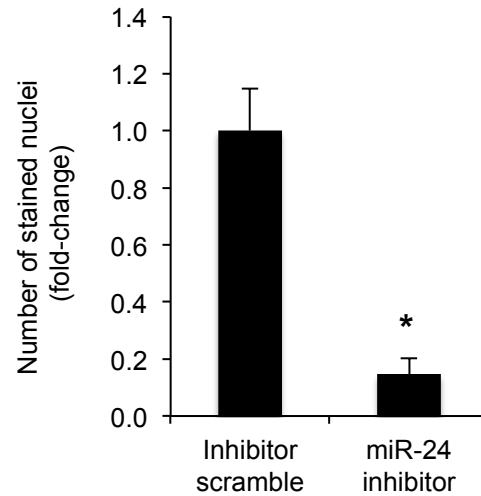

C

CD31 expression

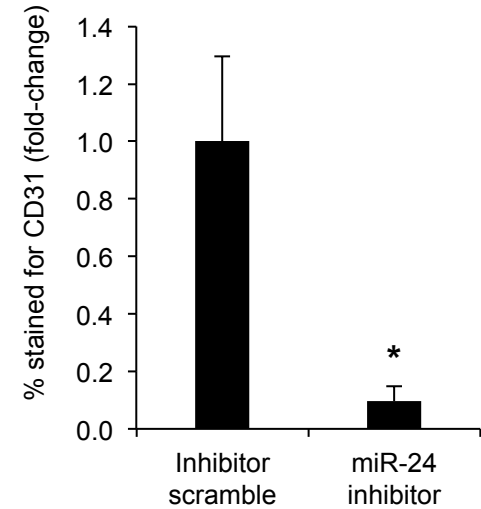

D

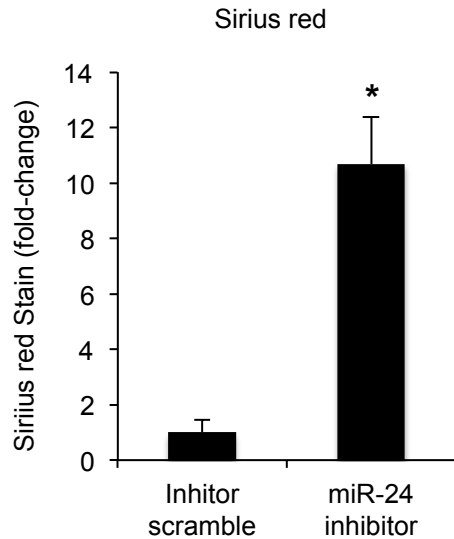

E

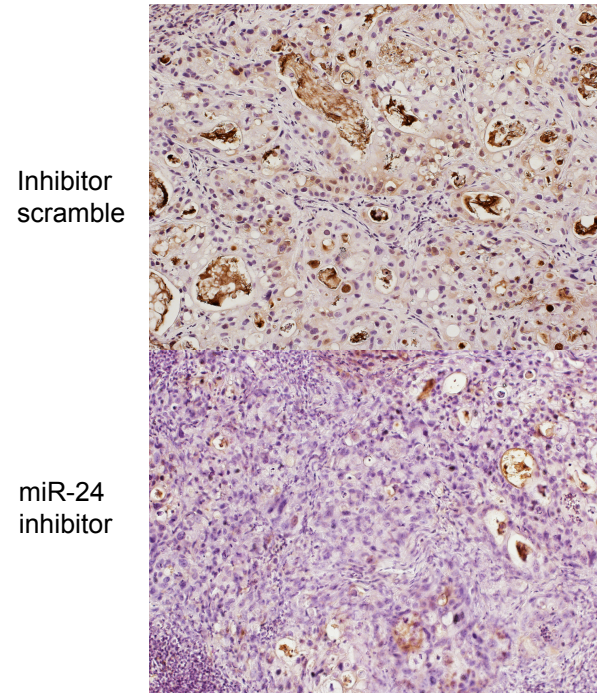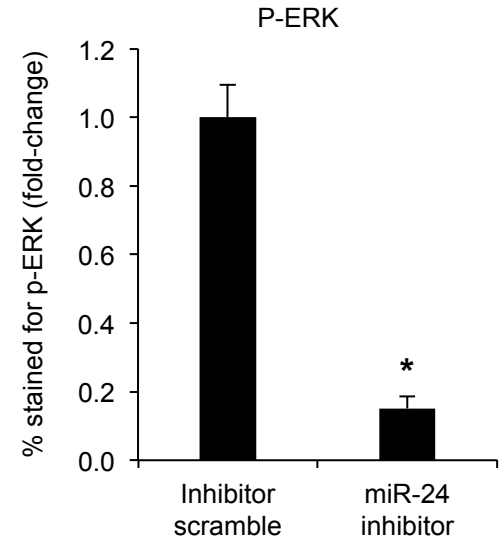

Supplement: mmc4.pdf [file mmc4.pdf]
