# Supplementary material
Source: PubMed Central journal article supplement (PMC5389363)

# Supplementary Figure 1

A

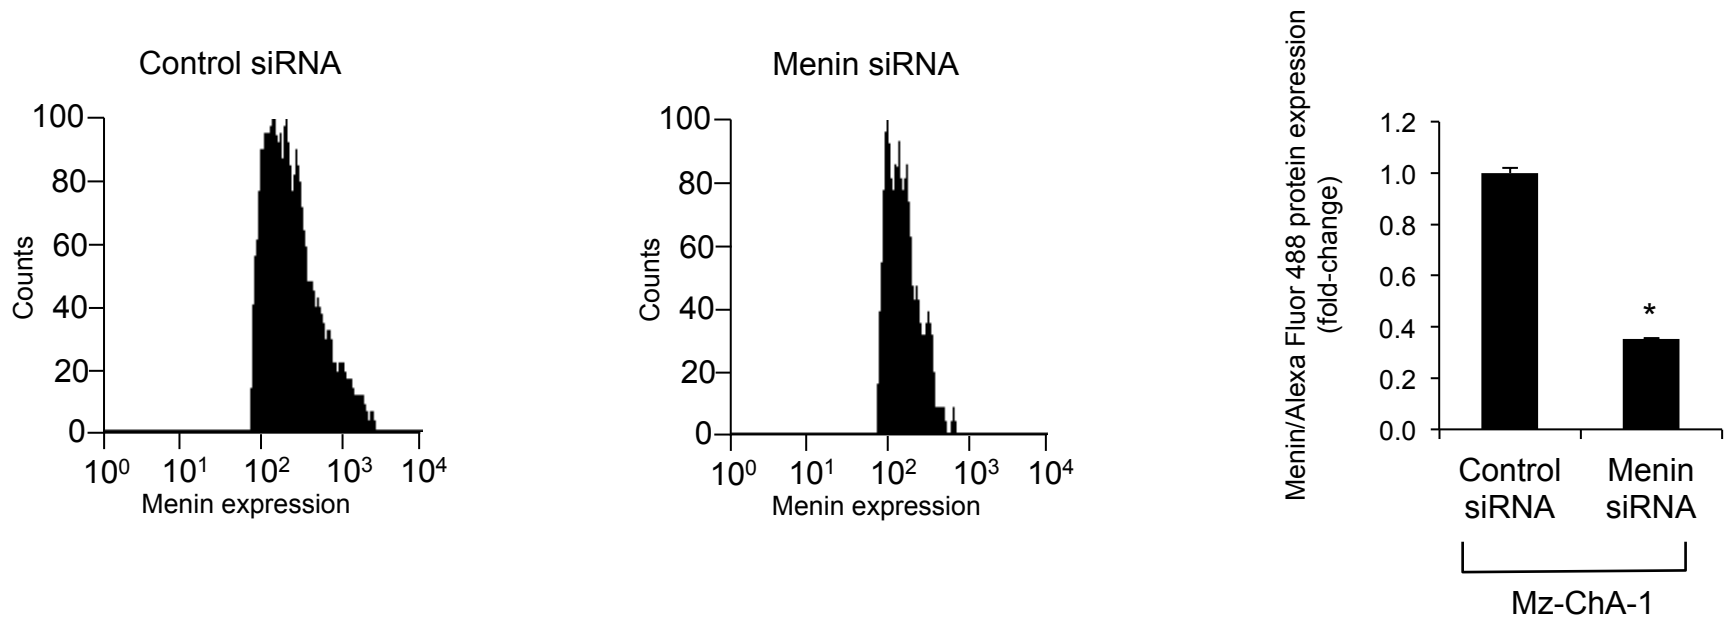

B

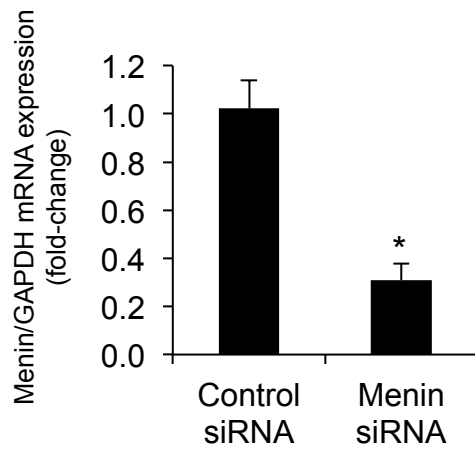

C

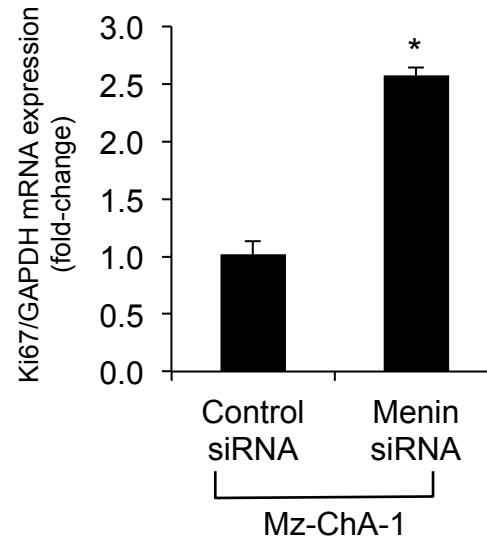

Supplement: mmc1.pdf [file mmc1.pdf]

# Supplementary Figure 2

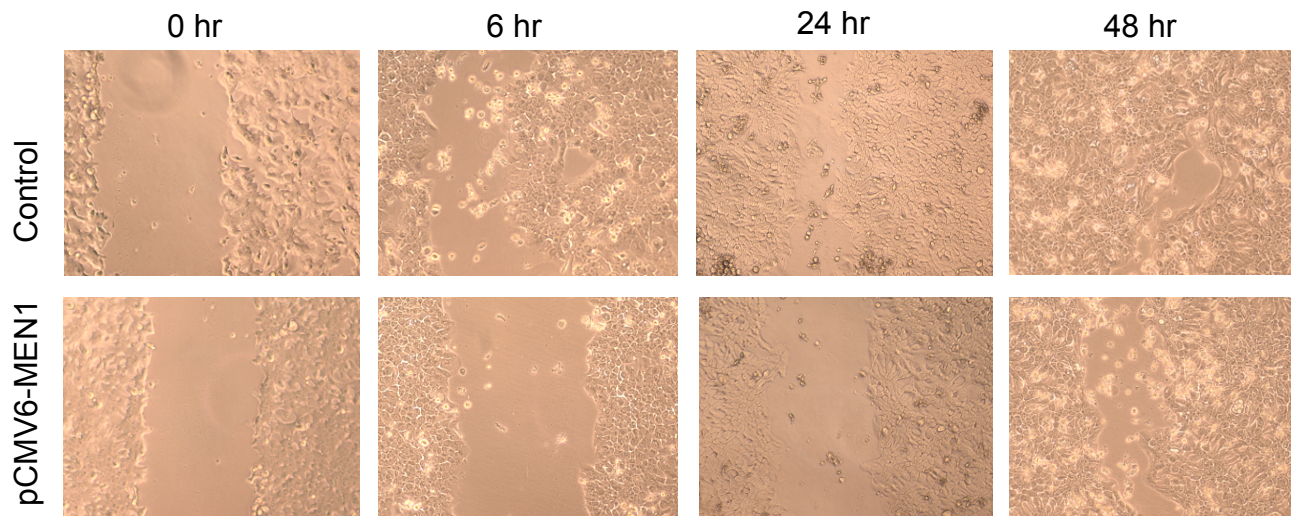

Supplement: mmc2.pdf [file mmc2.pdf]

# Supplementary Figure 3

A

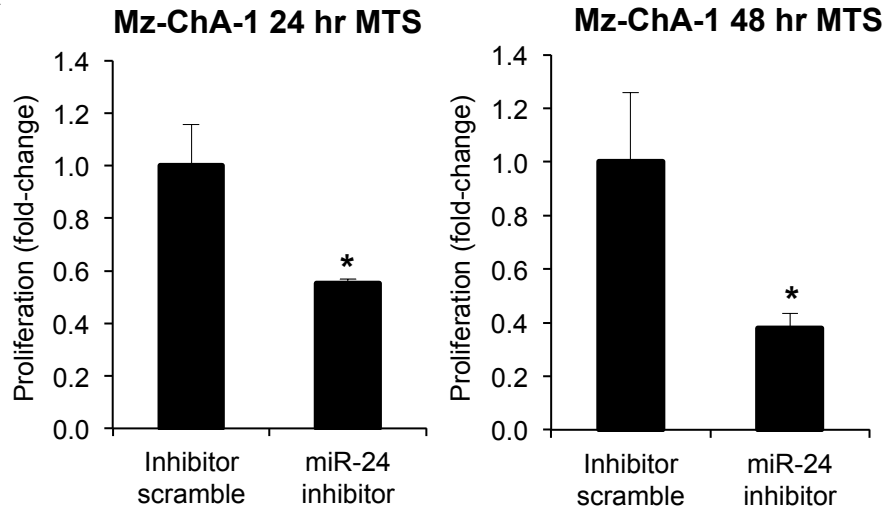

B

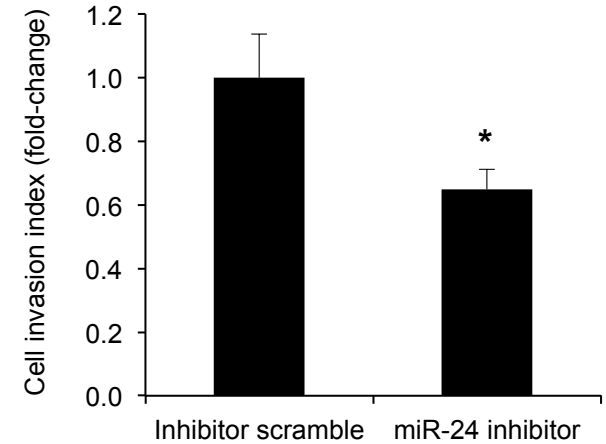

C

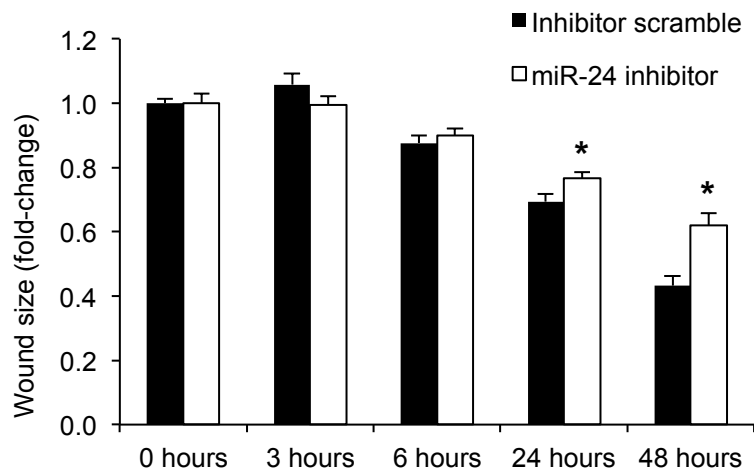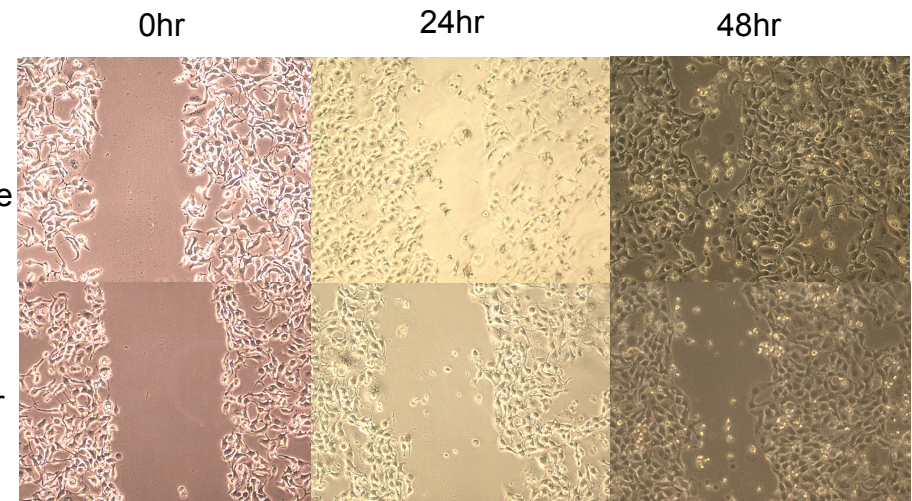

Supplement: mmc3.pdf [file mmc3.pdf]

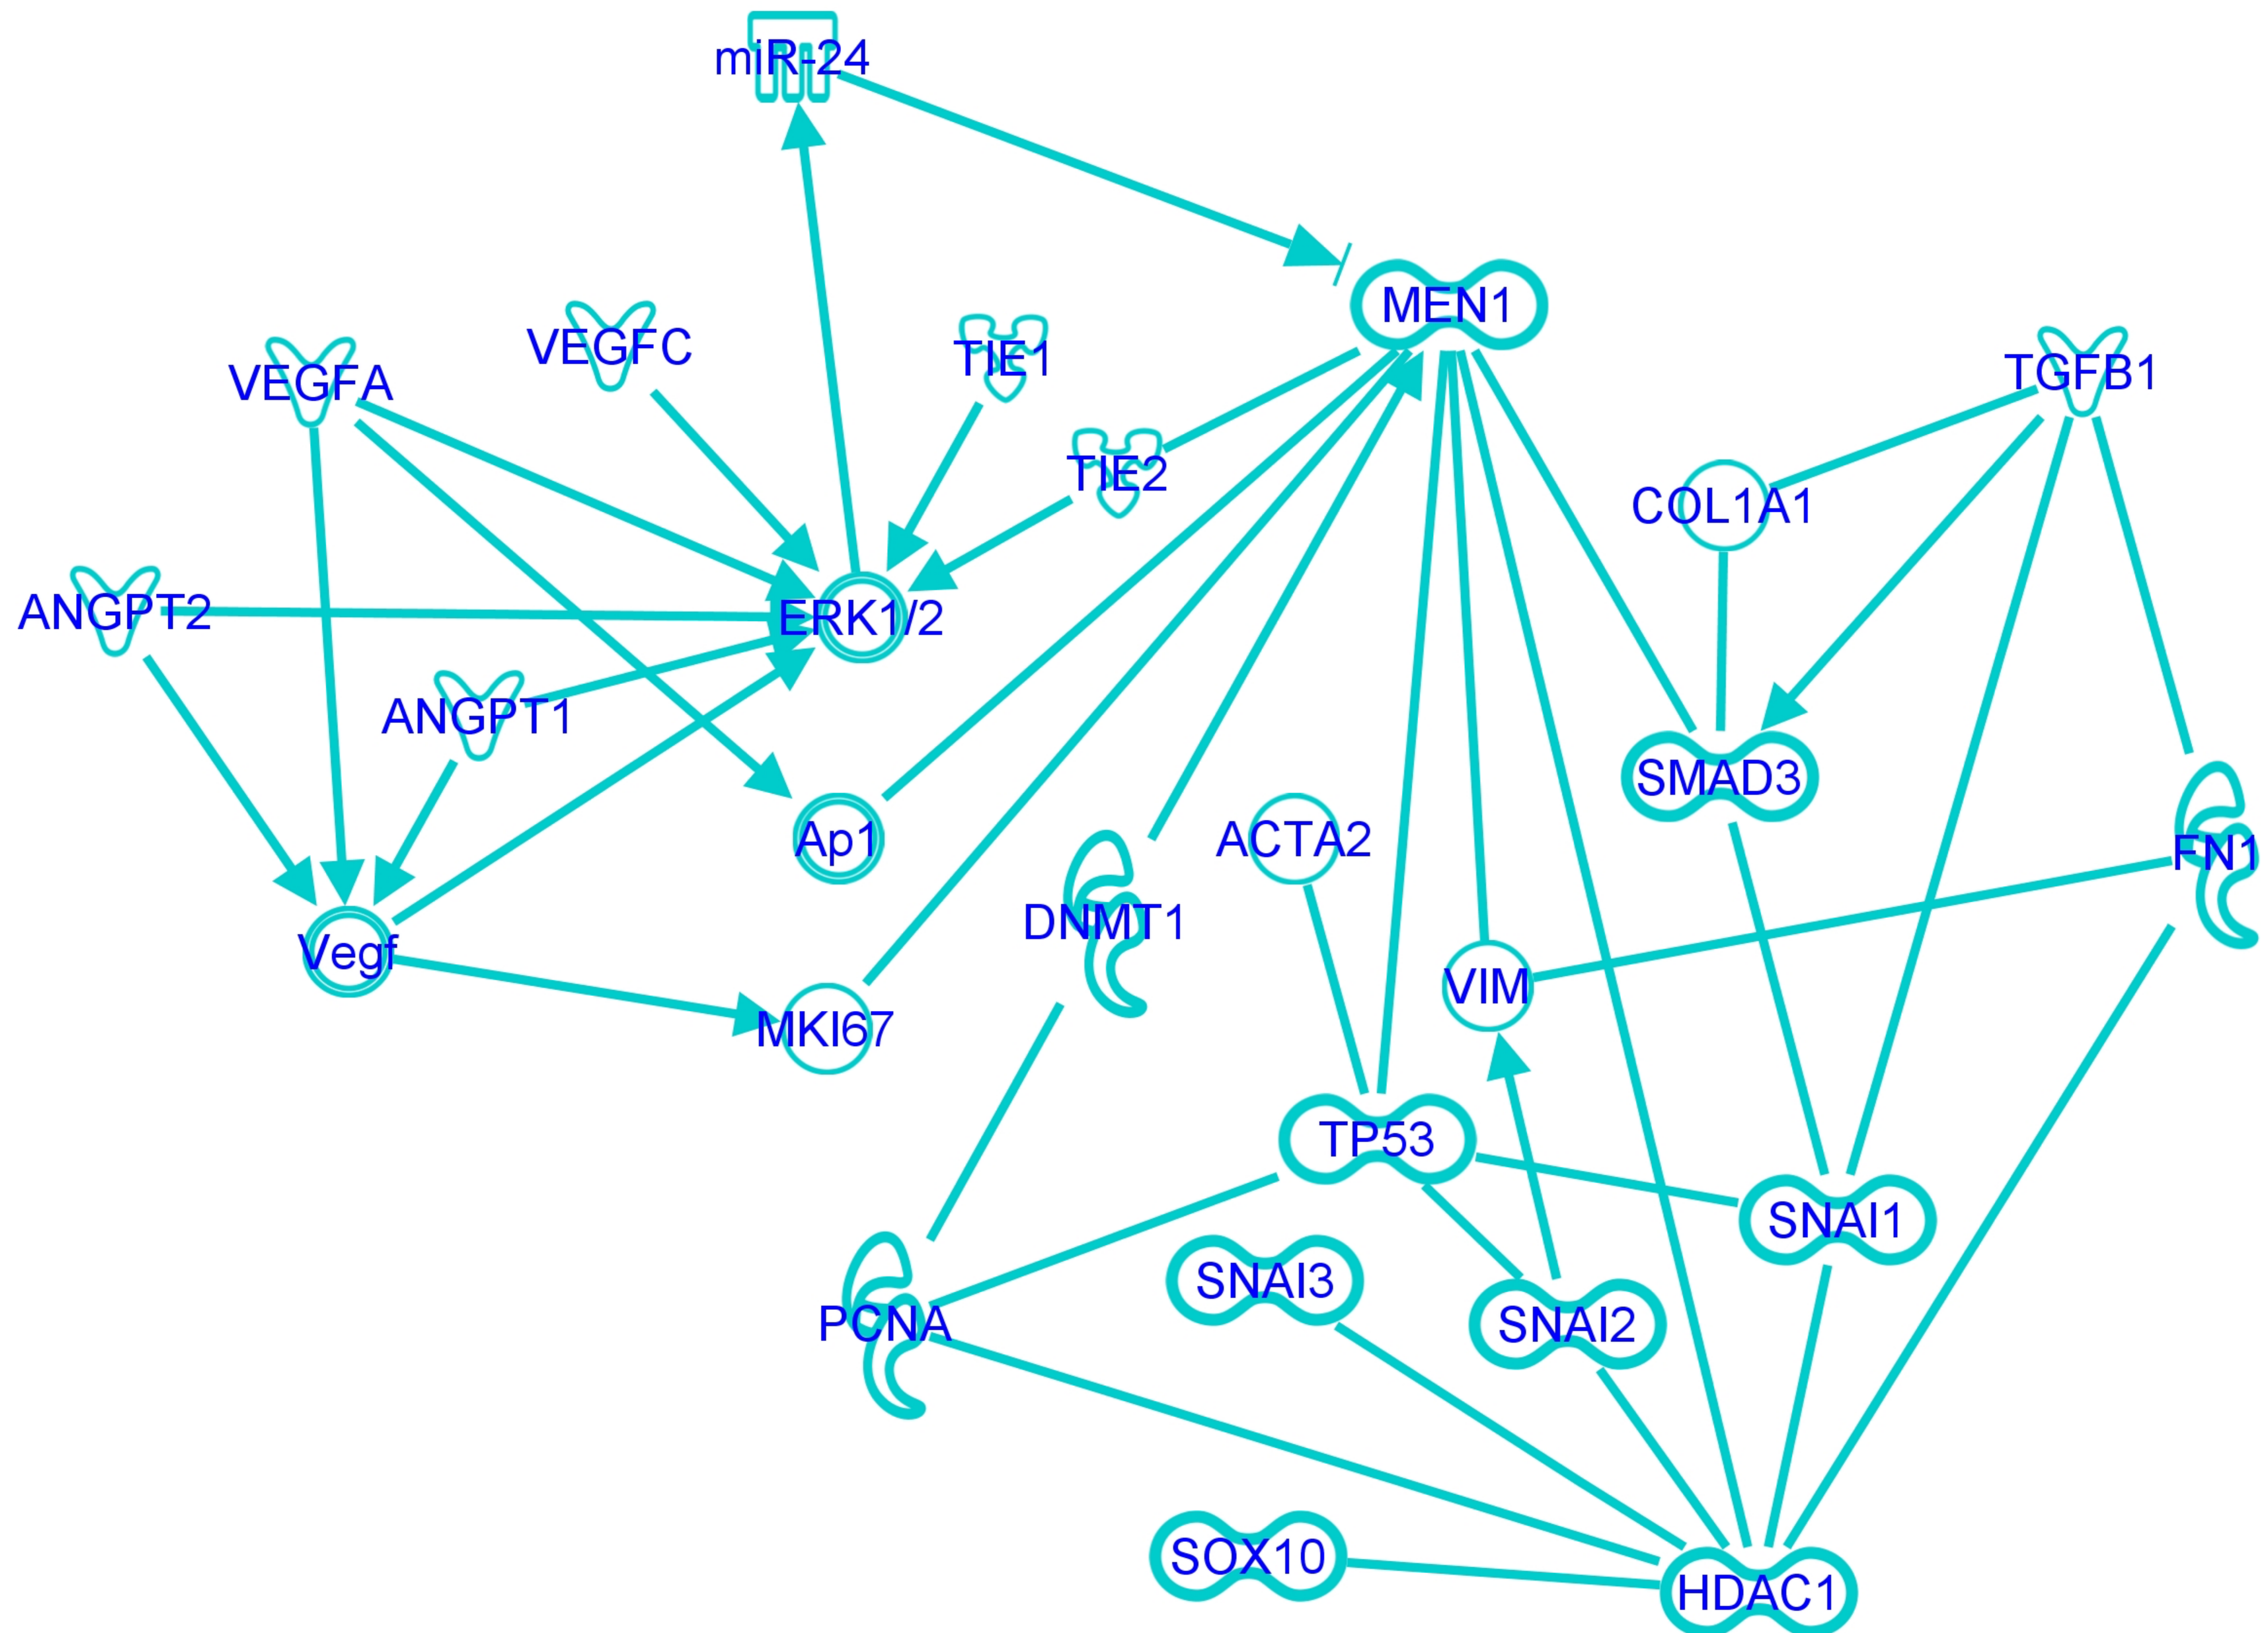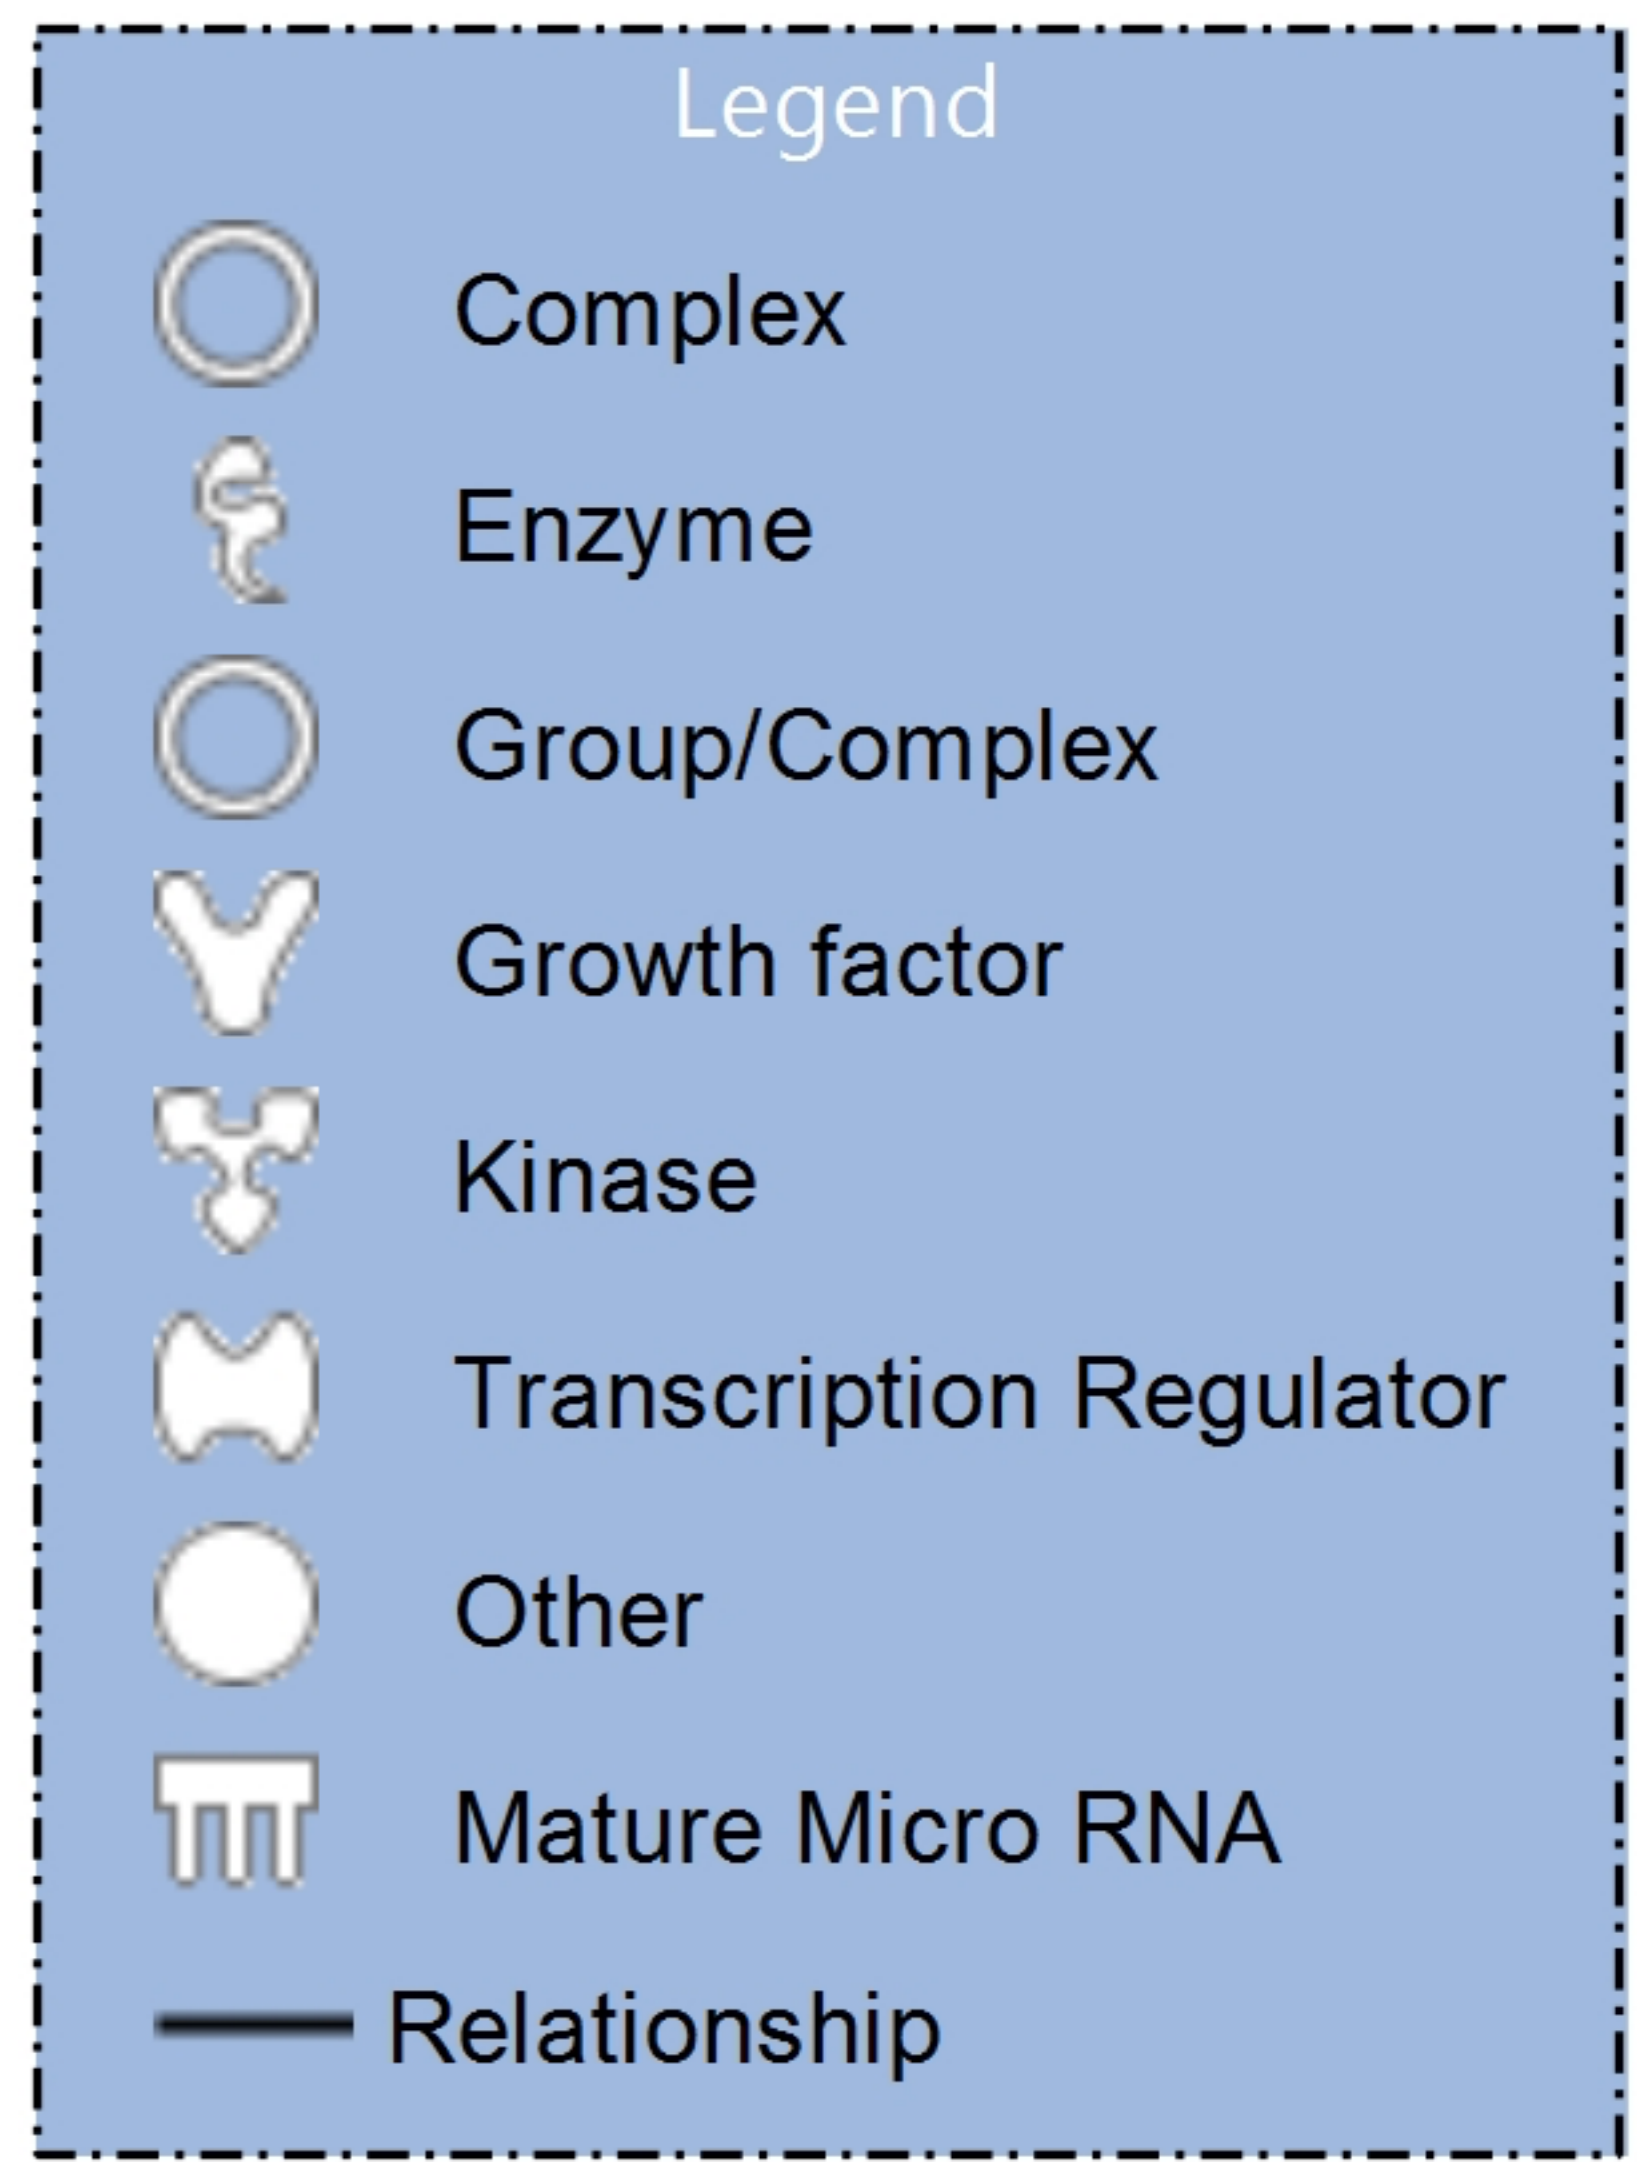

Supplement: mmc5.pdf [file mmc5.pdf]
